# Supplementary material for: Micromotors of MnO2 for the Recovery of Microplastics
Source: MDPI journal article supplement (doi:10.3390/mi15010141), 2024-01-17
Supplement: s1 [file s1]

# Supplementary Material: Micromotors of $\text{MnO}_2$ for the Recovery of Microplastics

Oscar Cervantes <sup>1,2</sup>, Claudia Valtierra-Montiel <sup>3</sup>, Laura Sampedro-Plata <sup>1</sup>, Norberto Casillas <sup>2</sup>, Nieves Menendez <sup>1</sup> and Pilar Herrasti <sup>1,\*</sup>

<sup>1</sup> Department of Applied Physical Chemistry, Faculty of Sciences, Autonomous University of Madrid, Francisco Tomás y Valiente 7, 28049 Madrid, Spain; ocervantesa@gmail.com (O.C.); laura.sampedrop@estudiante.uam.es (L.S.-P.); nieves.menendez@uam.es (N.M.)

<sup>2</sup> Department of Chemistry, Center of Exact Sciences and Engineering (CUCEI), University of Guadalajara, Marcelino García Barragán 1421, Col. Olímpica, Guadalajara 44430, Jalisco, Mexico; norberto.casillas@academicos.udg.mx

<sup>3</sup> Master's Program in Nanomaterials Science and Technology, Natural and Exact Sciences Division, University of Guanajuato, Noria Alta S/N, Guanajuato 36050, Guanajuato, Mexico; cd.valtierramontiel@hotmail.com

\* Correspondence: pilar.herrasti@uam.es

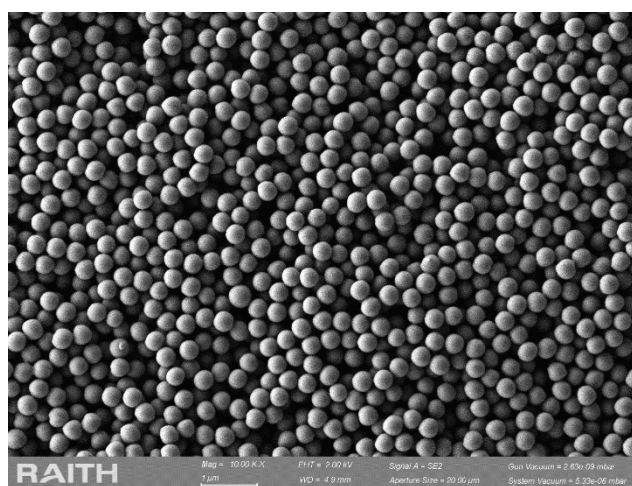

(a)

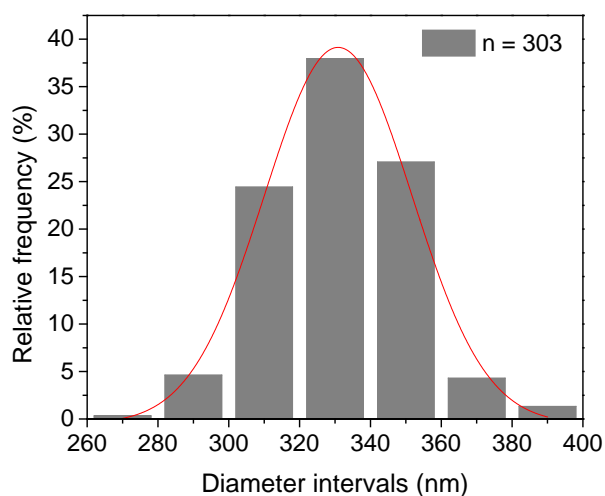

(b)

**Figure S1.** FSEM images of the PS particles (a), and their size distribution (b).

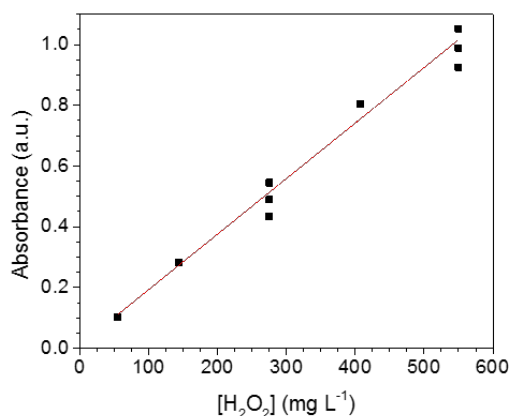

**Figure S2.** Simple regression and linear fit for Absorbance vs.  $[\text{H}_2\text{O}_2]$ .

**Table S1.** Coefficients and Analysis of Variance for I vs.  $[\text{H}_2\text{O}_2]$ .

| <i>Parameter</i> | <i>Least Squares Estimate</i> | <i>Standard Error</i> | <i>T Statistic</i> | <i>P-Value</i> |
|------------------|-------------------------------|-----------------------|--------------------|----------------|
| <b>Slope</b>     | 0.00185488                    | 0.000033572           | 55.2508            | 0.0000         |

  

| <i>Source</i>   | <i>Sum of Squares</i> | <i>Df</i> | <i>Mean Square</i> | <i>F-Ratio</i> | <i>P-Value</i> |
|-----------------|-----------------------|-----------|--------------------|----------------|----------------|
| <b>Model</b>    | 5.85499               | 1         | 5.85499            | 3052.65        | 0.0000         |
| <b>Residual</b> | 0.0268521             | 14        | 0.001918           |                |                |
| <b>Total</b>    | 5.88184               | 15        |                    |                |                |

**Table S2.** Analysis of Variance for  $\%[\text{H}_2\text{O}_2]$  remaining in solution vs.  $\%[\text{H}_2\text{O}_2]_0$ .

| <i>Source</i>         | <i>Sum of Squares</i> | <i>Df</i> | <i>Mean Square</i> | <i>F-Ratio</i> | <i>P-Value</i> |
|-----------------------|-----------------------|-----------|--------------------|----------------|----------------|
| <b>Between groups</b> | 27709.4               | 2         | 13854.7            | 39.43          | 0.0000         |
| <b>Within groups</b>  | 8432.77               | 24        | 351.366            |                |                |
| <b>Total (Corr.)</b>  | 36142.2               | 26        |                    |                |                |

**Table S3.** Analysis of Variance for  $\text{TOC}/\text{TOC}_0$  vs.  $[\text{PS}]$ .

| <i>Source</i>                                                | <i>Sum of Squares</i> | <i>Df</i> | <i>Mean Square</i> | <i>F-Ratio</i> | <i>P-Value</i> |
|--------------------------------------------------------------|-----------------------|-----------|--------------------|----------------|----------------|
| <b>MAIN EFFECTS</b>                                          |                       |           |                    |                |                |
| <b>A:PS (mg L<sup>-1</sup>)</b>                              | 0.002951              | 2         | 0.0014755          | 0.16           | 0.8520         |
| <b>B:[H<sub>2</sub>O<sub>2</sub>]<sub>0</sub> (% in wt.)</b> | 0.0903406             | 2         | 0.0451703          | 4.95           | 0.0194         |
| <b>INTERACTIONS</b>                                          |                       |           |                    |                |                |
| <b>AB</b>                                                    | 0.0543381             | 4         | 0.0135845          | 1.49           | 0.2474         |
| <b>RESIDUAL</b>                                              | 0.16432               | 18        | 0.00912891         |                |                |
| <b>TOTAL (CORRECTED)</b>                                     | 0.31195               | 26        |                    |                |                |

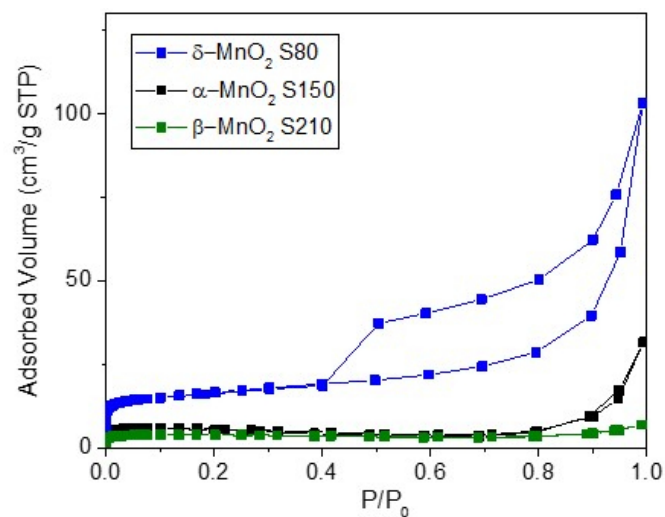

**Figure S3.** Nitrogen adsorption-desorption isotherms of the three MnO<sub>2</sub> synthesized samples.

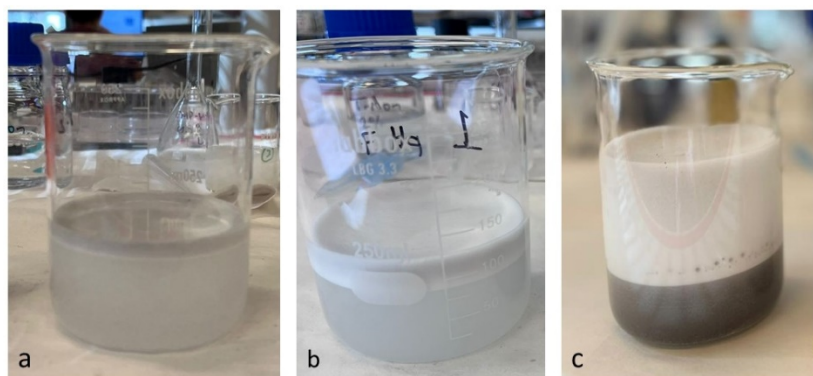

**Figure S4.** Effect of pH on the amount of foam formed after 5 minutes reaction time, with 0.2 g L<sup>-1</sup> MnO<sub>2</sub>, 20 mg L<sup>-1</sup> MP, 1.6% H<sub>2</sub>O<sub>2</sub> and 0.01% Triton-X. (a) pH 3, (b) pH 7, and (c) pH 9.

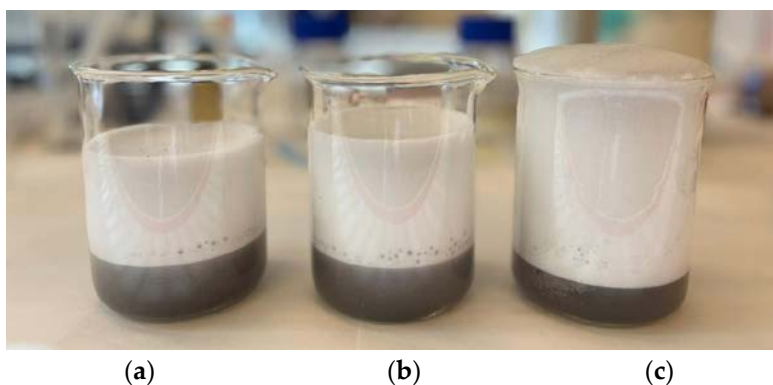

**Figure S5.** Effect of H<sub>2</sub>O<sub>2</sub> concentration on the foam formation 5 min after the reaction started. 0.2 g L<sup>-1</sup> MnO<sub>2</sub>, 20 mg L<sup>-1</sup> MP, pH 9 and 0.01% Triton-X. (a) 1.6% H<sub>2</sub>O<sub>2</sub>, (b) 3% H<sub>2</sub>O<sub>2</sub> and (c) 6% H<sub>2</sub>O<sub>2</sub>.
